# Supplementary material for: Zipf's Law Leads to Heaps' Law: Analyzing Their Relation in Finite-Size Systems
Source: PLOS journal article supplement (doi:10.1371/journal.pone.0014139), 2010-12-02
Supplement: S3 (10.1371/journal.pone.0014139.s003) [file journal.pone.0014139.s003]

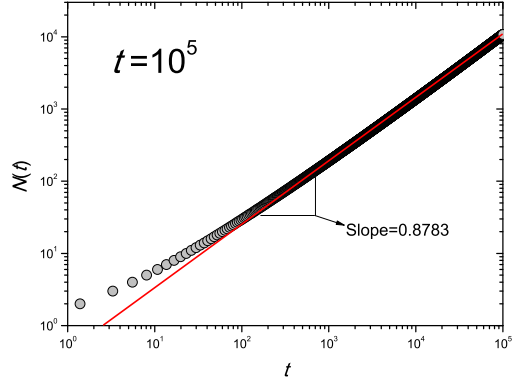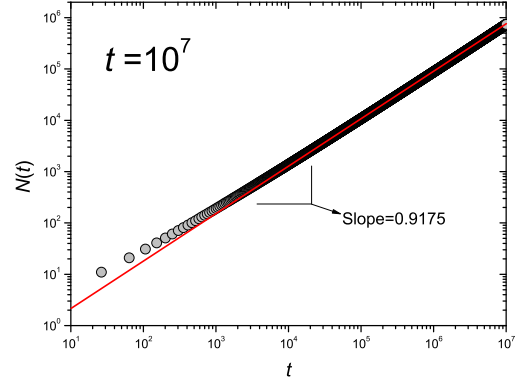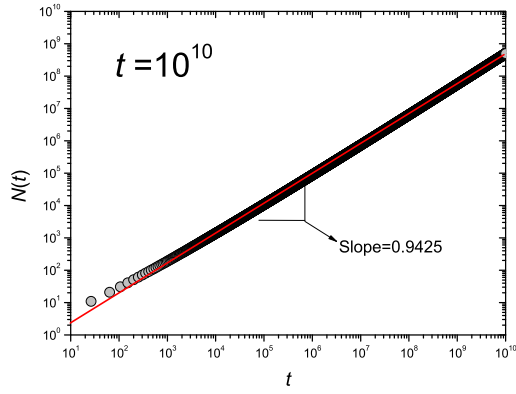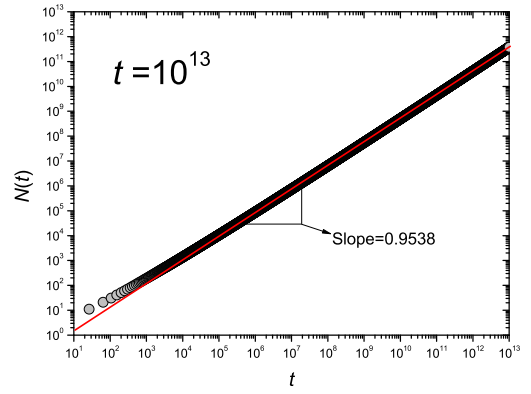

**Figure S3: Fitting Heaps' law with different system sizes.** The four plots show typical examples with different system sizes  $t$ , with  $\alpha = 1$  fixed. The fitting functions are obtained by using the linear regression with the least square method, which well capture the growing tendency of  $N(t)$ .
