# Supplementary material for: Zipf's Law Leads to Heaps' Law: Analyzing Their Relation in Finite-Size Systems
Source: PLOS journal article supplement (doi:10.1371/journal.pone.0014139), 2010-12-02
Supplement: S6 (10.1371/journal.pone.0014139.s006) [file journal.pone.0014139.s006]

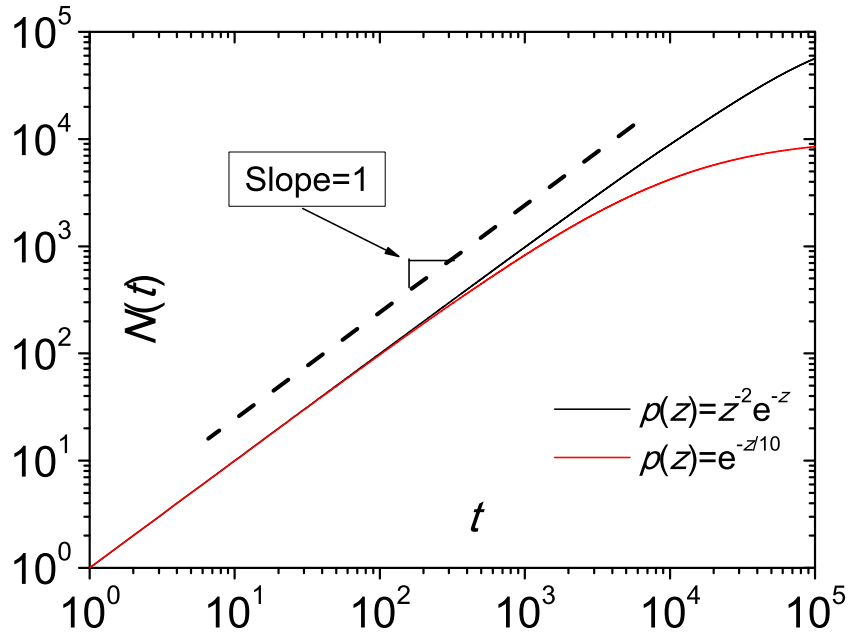

**Figure S6: Comparison of the growing tendencies of  $N(t)$  between the cases of power-law distribution with an exponential cutoff and the purely exponential distribution.** The black and red solid lines denote the results generated by a power-law distribution with a very strong exponential cutoff ( $p(z) \sim z^{-2} \exp(-z)$ ) and a purely exponential distribution ( $p(z) \sim \exp(-z/10)$ ). The dash line is of slope 1 for eye guidance.
